# Supplementary material for: Unmanned Aerial Vehicle (UAV)-Based Mapping of Acacia saligna Invasion in the Mediterranean Coast
Source: MDPI journal article supplement (doi:10.3390/rs13173361), 2021-08-25
Supplement: s1 [file s1]

# Unmanned Aerial Vehicle (UAV)-based mapping of *Acacia saligna* invasion in the Mediterranean coast

Flavio Marzioletti<sup>1, †, \*</sup>, Ludovico Frate<sup>1, †</sup>, Walter De Simone<sup>2</sup>, Anna Rita Frattaroli<sup>2</sup>, Alicia Teresa Rosario Acosta<sup>3</sup>, and Maria Laura Carranza<sup>1</sup>

<sup>1</sup> Envix-Lab, Departement of Biosciences and Territory, Molise University, Contrada Fonte Lappone, 86090 Pesche, Italy; envixlab@unimol.it (L.F.); carranza@unimol.it (M.L.C.)

<sup>2</sup> Department of Life, Health and Environmental Sciences, University of L'Aquila, Piazzale Salvatore Tommasi, 67100 L'Aquila, Italy; walter.desimone@graduate.univaq.it (W.D.S.); annarita.frattaroli@univaq.it (A.R.F.)

<sup>3</sup> Department of Sciences, University of Roma Tre, Viale G. Marconi 446, 00146 Rome, Italy; aliciateresarosario.acosta@uniroma3.it (A.T.R.A.)

\* Correspondence: flavio.marzioletti@unimol.it; Tel.: +39-329-154-3594

<sup>†</sup> Joint first authorship.

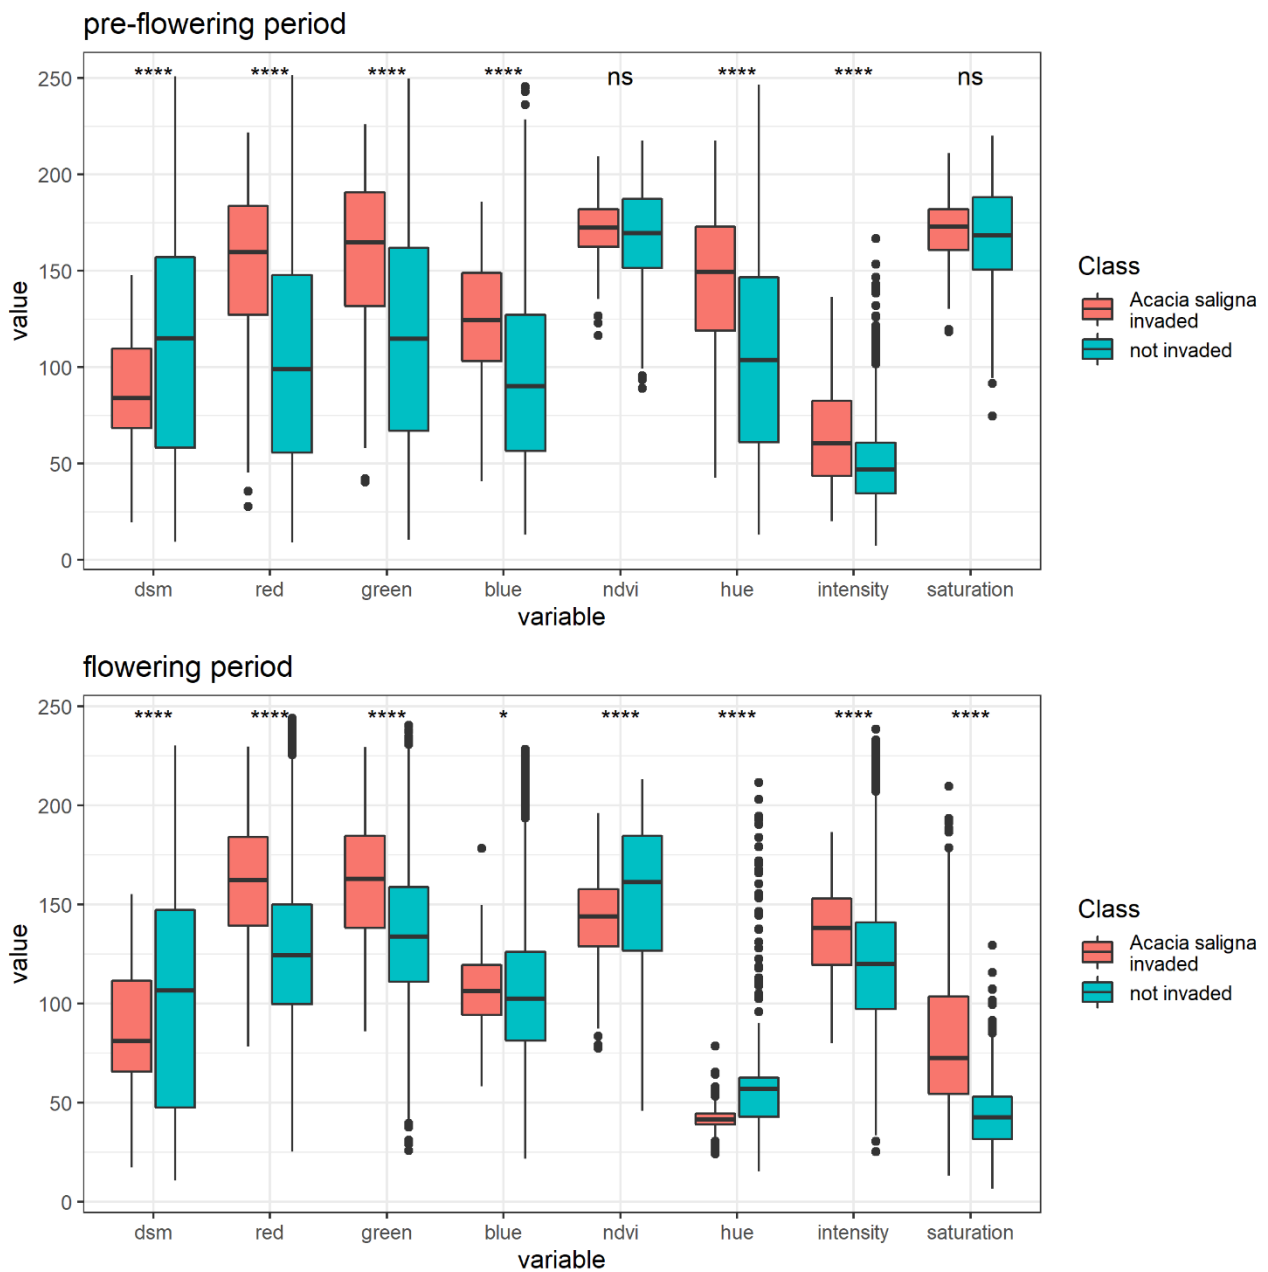

**Figure S1.** Boxplot representing the values of RS variables (DSM, Red, Green, Blue, NDVI, Hue, Intensity, Saturation) extracted from the training dataset for the *Acacia saligna* and Not Invaded classes during the pre-flowering (a) and flowering (b) periods. Asterisk indicate significant differences according to the Wilcoxon Signed Rank test (significance levels \* < 0.05, \*\* < 0.01 \*\*\* < 0.001 \*\*\*\* < 0.0001).
